# Supplementary material
Source: publisher figshare collection journal article supplement (https://gsapubs.figshare.com/ndownloader/files/38134806)
Supplement: Supplementary file 1 [file 38134806]

## Sheet: Table 1
Samples	Type	Lon.	Lat.	T	pH	EC	TDS	ORP	Ca	Mg	Na	K	HCO3-	CO3-	F-	Cl-	NO3-	SO42-	As	B	Li	BI	ð2H	ð18O		Billarent-Cedillo, A., Hernandez-Pérez, E., Levresse, G., Inguaggiato, C., Ferrari, L., Inguaggiato, S., Lopez-Alvis, J., and Silva-Fragoso, A., 2022, Mantellic degassing of helium in an extensional active tectonic setting at front of a magmatic arc (central Mexico): Geosphere, v. 18, https://doi.org/10.1130/GES02549.1
				°C		µs/cm	ppm	Mv	ppm	ppm	ppm	ppm	ppm	ppm	ppm	ppm	ppm	ppm	ppm	ppm	ppm	%	‰	‰
El Geyser (González-Guzmán et al., 2019)
LG01	deep well-groundwater	338800	2272833	98.1	6.94	1264	618	n.d.	2.28	0.07	211	8.25	273.9	0.2	22.6	91.6		41.4		3.04	1.34	0.0312	-74.8	-9.7
LG07	deep well-groundwater	338800	2272833	81.2	7.22	1217	598	n.d.	2.66	0.13	181	7.88	247	0.4	22.3	90.3		36.4		2.93	1.29	−0.79	-75.6	-10
LG22	deep well-groundwater	338800	2272833	83.7	9.15	1206	591	n.d.	1.57	0.16	189	6.1	148.9	22.3	25.2	96.9		43.1		3.18	1.09	0.029	-73.8	-9.4
LG25	deep well-groundwater	338800	2272833	80.4	7.08	1227	601	n.d.	3.51	0.69	195	5.89	227.3	0.3	23.9	94.4		48.1		3.15	1.35	0.0234	-74.8	-9.7
LG56	deep well-groundwater	338800	2272833	74.8	8.26	1254	614	n.d.	0.77	0.1	184	5.95	203.4	5.8	30.7	99.4		48.9		3.25	1.04	−3.43	-72.5	-8.9
LG85	deep well-groundwater	338800	2272833	94.3	9.33	1223	600	n.d.	1.81	0.15	176	9.57	103.4	22.8	27.8	97.8		45.9		3.39	0.95	0.0312	-73.8	-9.4
LG91	deep well-groundwater	338800	2272833	61.2	8.84	1208	597	n.d.	3.8	0.26	190	10.91	221.1	17.8	26.1	98		49.7		3.39	1.05	−2.63	-72.4	-8.9
San Juan del Río (Hernández-Pérez, et al., 2022; sampling period 2017)
204	rain	391242	2258787	-	6.58	23.61	14.49	-182.7	11.2723	0.0180479	0.0730747	0.0565494	28		0.025	0	1.0887	2.2148				4.09301
195	rain	370034	2274085	-	7.13	265.2	128.4	-117.6	28.4655	1.30146	0.918228	0.846635	79		0	1.1564	0	5.5912			0.00107259	4.79142
218	rain	370034	2274085	-	5.15	22.01	11.28	23.1	2.00153	0.176202	0.0721373	0.0546273	7		0	0	0	0.4215			0.000318531	-1.89467
25	spring	400060	2222746	18	6.82	158.2	77.8403	488.7	8.716	2.65	6.315	3.348	56		0.0463	1.7833	0.8959	1.0811		0.0493		0.284798	-75.386	-11.4348
26	spring	398664	2221199	17	7.46	167.4	82.3671	480	8.682	3.545	7.536	3.282	62		0.0481	1.1679	0.7293	0.8691		0.0491		2.48599	-75.1732	-11.0934
27	spring	398959	2220592	17	6.9	190.2	93.5855	493.1	10.7	3.906	7.517	3.057	68		0.0515	1.4129	0.4294	0.9667		0.0497		3.12277	-73.5239	-10.9016
28	spring	396375	2224512	21	7.67	299	147.119	481	7.346	2.886	11.58	4.435	70		0	1.7818	0.4627	0.6326		0.0524		0.121819	-68.7241	-9.87833
31	spring	383218	2234561	14	6.57	144.4	71.0502	483.7	6.772	1.685	7.742	5.302	56		0	2.0912	0.9937	3.2835		0.0477		-5.58549	-66.9548	-9.35821
32	spring	378245	2231318	16	6.44	338	166.309	516.4	17.57	4.222	15.1	5.535	74		0	10.2172	26.2577	14.1421		0.05		-4.6317	-63.5748	-9.38587
33	spring	374194	2239431	15	6.36	153	75.2817	508	5.884	1.842	10.6	2.385	42		0	3.6182	10.6886	1.0465		0.0482		-1.8567	-72.6475	-10.2604
34	spring	395042	2222092	15	6.8	233	114.645	494	11.25	5.236	8.516	6.363	78		0	1.3167	4.1857	1.1667		0.0476		4.02358	-70.5926	-10.3172
35	spring	396043	2223496	15	7.91	255	125.47	486	12.34	4.634	12.85	6.899	110		0	1.1499	0.2084	0.3213		0.048		-3.15643	-72.1957	-10.7094
36	spring	374646	2278458	14	7.7	1062	522.544	496	27.3	6.951	91.62	36.1	228		0.64	40.2	75.304	65.626		0.1624	0.0307	-4.95535	-66.4921	-9.39232
37	spring	368135	2267098	16	7.62	928	456.611	503.3	18.87	4.651	12.7	1.517	106		0.1763	4.2693	0.3868	0.8659		0.0483		0.636162	-69.2501	-9.72198
38	spring	374806	2258344	14	8.67	877	431.517	489.6	33.3	16.49	44.31	14	275		0.3789	7.0089	31.0564	9.9932		0.052	0.0129	-1.2098	-65.8824	-9.42583
39	spring	373433	2259643	16	8.52	444	218.465	489.9	18.93	7.318	32.89	6.621	172		0.1404	2.316	1.1904	6.4008		0.054	0.0107	1.65526	-70.0458	-10.4155
40	spring	391899	2249920	15	7.75	598	294.238	501	16.91	6.221	13.47	2.561	38		0.2943	5.2999	34.8217	25.6775		0.0487		2.69764	-74.8898	-10.3312
41	spring	392098	2272817	16	7.17	439	216.004	503.4	14.28	4.51	27.37	14.87	54		0.212	13.634	50.039	30.151		0.0583	0.0202	-1.13641	-80.2001	-11.0854
71	spring	386731	2288670	24	7.43	1625	796.9	434.5	68.15	17.23	136.9	56.12	168		0.1933	136.6	97	243.2		0.0952		-4.13256	-72.1	-9.89
121	well-groundwater	380114	2261430	35.2	7.56	282.7	138.8	432.9	17.11	4.184	32.25	8.767	150		0.2025	2.1775	6.7653	6.722			0.0058	0.811424	-74.8	-10.1
122	well-groundwater	378711	2264660	30.8	7.38	427.2	210.2	432.2	24.36	5.031	44.87	17.36	194		0.3636	2.7927	8.6803	26.757			0.0274	0.633732	-71.5	-9.5
123	well-groundwater	373015	2.26857e+06	34.1	7.66	344.9	169.4	441.9	21.01	6.851	37.3	9.379	172		0.287	3.0993	9.2079	14.9811		0.0701	0.0292	1.34865	-73.2	-10
125	well-groundwater	384692	2278860	28.8	7.53	401.2	197.1	453.6	24.97	4.778	44.89	16.46	195		0.7227	4.3409	19.0633	16.8849			0.0314	-0.0338587	-73.8915	-9.98862
126	well-groundwater	379580	2283140	36.1	7.93	288.1	141.8	449	12.33	0.1551	50.11	0.9019	105		3.1468	5.9323	3.428	32.4865			0.0458	0.806446	-73	-10.1
127	well-groundwater	391855	2279980	31.4	7.65	412.3	202.3	428	25.3	7.31	42.21	15.25	193		0.7912	5.2692	21.484	16.751	0.0322	0.0768	0.0918	0.507158	-71.1	-9.4
129	well-groundwater	390934	2272480	31.6	7.77	382.2	187.8	434.2	20.26	4.794	49.08	12.92	184		1.5463	4.1053	12.7642	17.2681	0.0241		0.0479	1.20901	-72.5	-9.9
130	well-groundwater	385500	2280980	28.7	7.46	263.9	130.1	449.3	13.68	3.732	28.47	11.34	102		1.2869	3.8164	9.43164	21.2581	0.0281		0.1184	1.53814	-77.1682	-10.6225
132	well-groundwater	379170	2279880	37.9	7.7	300.2	147.6	418.1	4.151	0.5899	59.82	0.9083	112		1.7396	7.8578	6.5151	23.8499			0.029	2.31712	-71.0796	-9.79005
133	well-groundwater	381193	2276180	32.3	7.61	389.1	191.2	432.7	25.29	5.379	42.15	11.14	166		0.3713	5.6783	14.7719	21.9835	0.0349	0.1321	0.0386	3.05398	-73.8546	-10.0129
134	well-groundwater	374513	2258297	23.3	7.76	586.1	287.9	417.6	42.62	18.38	43.81	14.69	284		0.3505	2.6397	24.472	17.2992			0.0514	3.65847	-71.7748	-9.61339
135	well-groundwater	383882	2264950	26.2	7.84	335.2	164.7	417.6	26.13	6.003	30.5	8.202	166		0.2594	3.7299	13.0056	8.2265			0.0147	1.73432	-71.3	-9.5
136	well-groundwater	387411	2264430	26.6	7.79	304.5	150.1	419.6	21.79	5.602	29.29	9.291	170		0.2711	2.3111	9.29637	4.7342			0.0234	-0.879246	-74	-9.9
137	well-groundwater	381168	2272940	31.6	8.08	462	226.9	410.4	33.31	7.086	43.94	11.32	212		0.0781	7.1873	4.80312	23.1871			0.0252	2.3521	-73.8811	-10.0714
138	well-groundwater	381177	2270040	32.6	8.1	264	129.9	416.6	16.37	3.324	29.88	8.235	130		0.2978	4.8102	7.38513	11.8824	0.0215		0.047	-0.910935	-75.1	-10.2
139	well-groundwater	373597	2274660	30.4	8.01	399.1	196.1	437.2	24.55	4.86	44.5	11.95	136		0.3853	26.3955	8.53236	28.3125			0.0284	1.88166	-73.3	-10
140	well-groundwater	370012	2283650	31.4	7.98	475	233.2	430.6	23.71	5.863	62.99	12.73	216		0.6238	9.3168	16.5064	16.8375	0.0218		0.056	2.67958	-73.3	-9.8
141	well-groundwater	369570	2278780	38.1	8.13	395	193.9	466.8	6.28	1.318	75.15	1.814	136		2.0096	15.2673	23.2181	32.9166		0.0893	0.0485	-1.16497	-70.7	-9.6
142	well-groundwater	368129	2.27539e+06	31.8	8.12	359	176.5	457.5	19.72	5.697	41.77	10.12	156		0.4293	8.9702	10.778	21.699	0.058	0.1321	0.1012	1.00902	-73.1232	-9.99858
177	well-groundwater	396968	2254340	36.1	7.89	319.6	157.1	473.6	15.54	3.419	26.84	6.609	122		0.2224	2.8367	4.74633	7.2495		0.0584	0.0483	1.58162	-75.3	-10.4
180	well-groundwater	378697	2243320	26.2	7.68	262.6	131.3	260.7	11.03	4.783	19.36	6.463	108		0.2847	1.9406	0.69345	4.9521	0.021		0.0239	-0.28701	-71.4	-10.2
181	well-groundwater	386731	2252500	33.9	8.07	426.2	213.1	476.3	15.04	7.019	36.89	10.47	164		0.2524	2.2866	7.32591	10.9309	0.0174		0.0258	1.40982	-75.5134	-10.1597
182	well-groundwater	385429	2255360	35.4	8.17	381.1	190.55	368.2	16.35	4.829	32.63	8.821	132		0.2147	8.354	5.60142	12.0377	0.0123		0.029	1.90342	-72.2	-9.8
183	well-groundwater	395971	2258500	35.7	7.96	410.1	205.05	433	22.18	4.943	30.79	8.517	146		0.1925	6.4225	18.0189	9.9542	0.0123		0.0288	-0.185706	-73.8142	-10.1627
184	well-groundwater	390719	2264900	29.4	7.94	444	222	462	21.65	5.029	35.7	10.37	164		0.2582	3.898	15.1733	7.2025	0.0158		0.028	1.62757	-73.1151	-9.84258
185	well-groundwater	394787	2254570	29.7	7.75	654.7	327.35	520.6	37.93	9.095	40.37	12.26	172		0.1874	22.425	19.9485	35.399	0.018		0.0333	2.06293	-71.8	-9.7
187	well-groundwater	399139	2260880	29.4	8.56	669.1	334.55	357.6	15.56	3.587	82.82	10.77	164		0.2288	58.158	14.7366	8.6671	0.0145		0.035	1.96613	-76.1828	-10.3243
189	well-groundwater	402278	2254300	36	8.1	362.3	178.1	364.3	14.13	5.191	34.05	7.491	156		0.3276	2.4288	6.0246	6.1301	0.0141		0.0289	-1.24332	-76.9131	-10.4875
179	well-groundwater	405328	2245940	41.5	9.08	549.7	274.85	398.5	1.659	0.5857	97.69	1.146	222		3.2502	9.5776	0.30924	16.5102	0.0158		0.0268	-0.23187	-73.2	-10.1
120	well-groundwater	382137	2234320	22.1	7.52	157	77.47	474.2	11.25	5.086	8.739	4.3	75		0	1.7965	9.3574	2.8614	0.0319	0.2148	0.1281	-0.691119	-77.9	-10.5
119	well-groundwater	361360	2266720	31.1	7.62	486.8	239.1	453.1	28.1	16.75	50.67	9.122	282		0.3367	2.8228	11.641	15.7997			0.0234	-0.174982	-77.938	-10.2438
124	well-groundwater	386948	2288550	32.9	7.81	223.3	110	422.2	13.99	1.567	27.76	5.823	98		2.7641	5.0845	5.9617	6.6925			0.0311	1.22599	-80.3926	-11.0519
128	well-groundwater	384508	2281190	29.8	7.95	260.1	128.1	450.4	17.58	3.977	25.06	11.54	132		0.6448	2.6787	11.3909	10.2847	0.0235		0.0081	-1.5417	-80.9047	-11.2611
131	well-groundwater	383637	2278310	31.7	7.7	346.5	170.2	436.7	20.68	4.686	41.82	9.685	162		0.7658	4.0269	10.765	15.893			0.0416	2.51188	-67.7409	-8.15897
178	well-groundwater	411530	2251960	29.9	7.91	579.7	284.6	452.3	20.34	17.01	35.45	16.26	218		0.7093	5.5299	17.4366	7.2287	0.0124		0.0179	1.93118	-81.3	-10.8
186	well-groundwater	393128	2257690	27.8	7.37	355.3	177.65	505	18.8	6.867	20.44	9.746	128		0.0875	2.8992	17.6323	6.1985	0.0136		0.0106	0.835706	-79.8	-10.9
188	well-groundwater	401857	2255110	34.1	8.15	387.4	193.7	333.8	14.85	5.431	38.37	8.843	168		0.4005	2.6508	6.7875	5.2355	0.0145		0.0301	0.247888	-77.4575	-10.4457
Sta. Cruz Forrajes	well-groundwater	363597	2.29112e+06	40.7	7.66	410	200.98	344.3	32.3689	7.35492	22.6724	19.0275	165		0.911099	9.9678	25.6723	17.2728		0.0323309		-0.0104717	-72.0778	-10.0721
PO057AM	well-groundwater	372554	2.30088e+06	27	6.88	341	167.157	412.6	30.5082	6.87125	44.1947	21.672	220		0.424288	6.1306	13.0097	16.9835		0.0352826		0.0285441	-74.9066	-10.0395
Vista Hermosa	well-groundwater	377150	2.29464e+06	31.2	6.97	448	219.608	454.8	29.8141	6.21604	52.8356	22.1233	215		0.963154	11.8914	15.4854	20.3928		0.0798813	0.00415822	0.0346207	-75.4976	-10.2734
Nogales	well-groundwater	380053	2.29063e+06	35.8	7.57	406	199.02	359.8	12.9239	1.13581	65.9328	16.2161	155		2.55341	15.5616	13.0566	35.9204		0.0767069	0.0527905	-0.0018361	-68.0861	-9.59584
Querétaro (unpublished data, sampling period 2013)
El Pueblito 2-A	well-groundwater	349447	2272275	27.7	7.65				43.4	15.79	48.818	13.54	276		0.56	15.7	28.37	29.6		0.06	0.0423	-0.00677513	-71.1873	-9.65381
Colegio Fray Luis de León	well-groundwater	353481	2276906	25.5	7.72				71.27	27.99	71.401	14.57	300		1.54	37.1	79.94	90		0.1118	0.1457	0.00988842	-73.2407	-10.0485
Singer Mexicana	well-groundwater	352621	2279060	25	7.76				65.31	21.38	103.488	15.46	250		1.07	53.7	51.25	140.4		0.1357	0.1498	0.0281481	-72.1957	-9.80655
Unidad Deportiva 2	well-groundwater	351934	2273559	30.3	8.84				27.94	11.62	50.578	11.34	212		0.53	17.2	1.43	46.8		0.0511	0.0439	-0.00942987	-72.9303	-10.1484
El Nabo	well-groundwater	349315	2289874	30	8.51				34.72	8.552	47.784	8.206	246		0.51	2.4	9.19	16.7		0.0173	0.0361	0.0175948	-75.0422	-10.2418
Acequia Blanca	well-groundwater	346566	2291895	34.1	8.42				25.05	11.41	36.465	9.106	208		0.5	2.9	8.29	11.5		0.3182	0.0194	0.0210562	-76.8569	-10.6545
Los Olvera 2 (Vitrales)	well-groundwater	351543	2271794	38	8.63				15.5	3.502	109.912	5.489	206		0.57	19.4	39.16	75.4		0.1332	0.0365	-0.0152581	-70.813	-9.65667
Tlacote El Bajo 2	well-groundwater	343282	2284015	30.3	8.56				30.72	9.391	54.032	10.74	230		0.49	5.3	14.18	22.3		0.0432	0.0365	0.0365141	-74.3041	-10.2728
Hercules 2	well-groundwater	358598	2278595	30.1	8.39				33.42	10.7	54.263	9.851	184		1.09	21.5	26.8	44.5		0.07	0.0627	0.0158219	-73.6373	-10.2082
Expositor 2	well-groundwater	356649	2276137	35.6	8.33				60.72	20.77	59.587	16.07	224		0.65	22.6	37.65	139.6		0.0558	0.0666	-0.00456139	-72.8625	-10.0923
Capilla 1	well-groundwater	350868	2276178	24.5	8.05				53.66	20.17	63.283	13.15	248		0.92	34.8	24.31	49.8		0.0645	0.0876	0.0686753	-71.3891	-9.70749
Vanegas La Noria	well-groundwater	350526	2274104	29.6	8.43				55.68	19.61	61.446	13.72	278		0.61	36.8	34.23	49.5		0.0658	0.0635	0.0182945	-70.9321	-9.53418
San Pedro Martir 2	well-groundwater	347536	2280212	29.8	8.18				28.56	10.64	48.763	9.238	214		0.73	5.7	13.85	27.4		0.0573	0.0575	0.0228632	-74.9973	-10.2063
Jurica Robles	well-groundwater	349359	2285610	24.3	8.06				87.92	27.8	68.486	15.94	246		1.16	28.7	46.79	113.6		0.184	0.1347	0.0552513	-69.9132	-9.14161
San Miguel Carrillo 2	well-groundwater	347276	2284546	30.9	8.24				20.18	5.57	73.436	7.641	224		1.12	11.7	10.07	31		0.3487	0.1575	0.00421334	-72.4694	-10.0273
Cañada 4	well-groundwater	362126	2279724	30.3	8.41				20.83	5.829	41.019	9.483	196		1.08	6.4	13.08	17.8		0.0537	0.045	-0.0376021	-74.4903	-10.159
Estadio 3	well-groundwater	358253	2275831	32.3	8.14				19.72	6.21	35.068	9.741	210		0.57	6.4	11.4	19.9		0.0312	0.034	-0.0280358	-74.3988	-10.2297
UNAM-Juriquilla	well-groundwater	349569	2289717	36.6	8.23				4.801	0.9462	123.31	8.681	316		3.81	10.9	1.56	31.3	0.0331	0.5417	0.1833	-0.0312566	-73.6121	-10.4176
Mompaní Poblado	well-groundwater	343216	2288007	25.8	8.13				75.58	8.954	57.86	8.685	316		0.33	10.8	49.67	50.9		0.0162	0.0432	0.00789557	-73.1482	-9.89384
Calichar	well-groundwater	343817	2266323	30.9	8.32				7.327	2.311	92.752	4.135	306		0.62	5.8	15.95	25.3		0.0471	0.0237	-0.0426799	-75.4598	-10.1237
Negreta 2	well-groundwater	349038	2270430	29.9	8.31				38.65	18.47	67.991	18.82	322		0.83	9.7	24.9	33.9		0.0564	0.041	0.0192478	-69.9158	-9.03553
Esmeralda	well-groundwater	351041	2269378	35.2	8.34				12.7	2.609	88.715	3.749	242		0.72	7.3	13.38	40.2		0.0438	0.0486	-0.00817392	-72.3014	-9.40814
Miranda	well-groundwater	361444	2274689	31.3	8.47				19.83	6.849	36.201	10.2	200		0.75	7.2	14.28	19		0.0338	0.0364	-0.0323684	-74.7977	-10.1339
Mompani 1	well-groundwater	345252	2288753	28.3	8.31				33.84	9.572	49.753	7.681	220		0.44	2.3	8.89	17.5		0.0144	0.04	0.076778	-77.1134	-10.258
Fraccionamiento Huertas La Joya	well-groundwater	343791	2280924	30.7	8.13				26.41	10.84	47.355	11.46	405		0.64	3.8	11.04	22.6		0.0455	0.0391	-0.0362494	-72.4205	-9.9844
Puertas del Sol	well-groundwater	345737	2282913	32.9	8.19				25.42	11.57	42.812	9.92	206		0.68	4.3	10.81	18.6		0.0477	0.0342	0.0343378	-72.9462	-10.1915
Santa Fe	well-groundwater	349400	2276781	27.6	8.11				43.5	17.47	68.508	13.1	306		1.17	20.9	17.15	36.1		0.0751	0.1277	0.0222002	-69.5463	-9.45658
Poniente 1	well-groundwater	347768	2275756	29.3	8.35				37.4	14.51	54.461	12.69	278		0.72	10.6	11.09	26.4		0.0558	0.0716	0.017626	-70.8528	-9.59963
Lourdes	well-groundwater	347393	2270033	32.7	8.46				31.97	15.52	77.594	11.24	206		1.46	21	35.7	80.7		0.0742	0.0627	0.0214032	-74.182	-9.7763
Huertas del Santuario	well-groundwater	348776	2273487	28.6	8.36				43.85	15.75	52.536	12.41	172		0.82	18.8	25.78	31.5		0.0512	0.0577	0.0311425	-70.9626	-9.57778
El Romeral	well-groundwater	344069	2271530	32.2	8.34				34.65	17.07	83.754	14.25	218		0.88	27.8	36.48	122.9		0.1307	0.0746	-0.0250078	-72.3131	-9.35159
La Alberca	well-groundwater	346688	2271782	31.1	8.16				35.89	15.09	74.206	15.13	216		1.04	16.4	27.61	78.8		0.0814	0.0677	0.0173246	-72.1309	-9.46775
El Camino	well-groundwater	346329	2272303	27.2	8.39				36.52	14.06	53.46	12.84	246		0.75	12.1	18.84	38.7		0.0714	0.0531	0.0150971	-69.9252	-9.10908
El Horno	well-groundwater	347357	2271938	32.8	8.1				29.69	8.934	72.567	10.01	210		1.2	16.1	15.24	52		0.0692	0.081	0.0357692	-71.8216	-9.42474
Cardanes	well-groundwater	350594	2280748	31.8	9.03								190		10.13	21.6		99.4				-0.0265486	-73.5295	-9.91609
Agrogen 1	well-groundwater	346829	2277855	30.2	8.04								270		1.62	25.9	16.51	58.3				-0.0391341	-70.3128	-9.37344
Santa María 1	well-groundwater	347494	2279191	26.7	8.3								300		0.92	28.3	17.81	42.1				0.0746245	-70.5473	-9.34674
Vidriera 2	well-groundwater	351269	2279871	28.2	8.41								122		2.12	36.7	30.36	132.3				0.0281926
Celaya (Amézaga-Campos, 2020)
GCCap	spring			15.5	7	310	20		32.9	16.8	24.9	6.9	197		2.7	20.5	0	34.5	0.00103		<ld	-7.9	-76.6	-10.29
GCT19A	well-groundwater			17.7	7.3	680	340		94	11.1	93.3	13.2	493		3.2	29.8	0	47.1	0.00721		1.1	-1.5	-66	-8.19
GCSMO	well-groundwater			28	7.9	980	490		82.3	2.7	215.2	19.2	505		2	79.2	0	118.9	0.04321		1.5	0.9	-70.9	-9.05
GCCant	well-groundwater	306834	2271279	28.5	7.3	764	489		52.4	5.5	83.3	18.6	272		1.3	46.2	0	65.9	0.00703		1.1	3	-73.3	-9.6
GCRq	well-groundwater			29	6.9	681	436		40.6	17.2	64	13.7	326		0	24	0	38.9	0.00663		1.1	-10	-73.8	-9.61
GClOA	well-groundwater	309947	2274656	30	6.9	746	478		42.3	17	76.3	15.5	343		0	25.5	0	44.1	0.00874		1.1	-1.6	-73.1	-9.44
GCCama	well-groundwater			31.1	7.5	810	400		36	4.1	197.8	22.5	568		0	28.9	0	48.1	0.05365		1.5	-2.1	-61.1	-7.5
GCGAlv	well-groundwater			31.3	8.4	1030	510		35.1	7	271.1	14.6	646		1	88	0	62.1	0.10939		1.9	0.1	-73.9	-9.39
GCGalx	well-groundwater			31.3	7.2	664	425																-72.9	-9.53
GCGalx(2)	well-groundwater			31.5	7.2	664	425																-72.9	-9.53
GCEX	well-groundwater	310878	2271719	32.2	6.8	741	482		37.8	20.7	76	16.1	309		0	27.6	0	60.5	0.00678		1.1	-0.8	-72.9	-9.48
GCGH	well-groundwater	305320	2273994	32.5	7.2	667	427		25.9	5.7	105.1	13.6	287		3.2	24.2	8.9	18	0.00771		1.1	4.4	-74.6	-9.86
GC3G	well-groundwater			35	7.4	608	389		29	8.8	74.1	16.3	249		0	30.7	0	43.5	0.00474		1.1	-2.1	-73.9	-9.75
GCLCant	well-groundwater			36.6	7.2	640	410		31.3	11.7	76	14.8	286		0	23.7	0	45.2	0.00606		1.1	-2.5	-74.4	-9.78
GCJau	well-groundwater			39	8.2	630	320		18.4	6.6	148.1	18.8	265		3.2	63	0	64.5	0.02121		1.2	4.2	-73.7	-9.7
GCNThai	well-groundwater			45.7	7.4	669	428		23.4	8.3	84.8	16.6	284		0	27.1	0	46.6	0.00651		1.1	-4.7	-72.2	-9.47
GCCCamp	well-groundwater	312677	2271852	46.6	6.8	741	482		29.1	3.2	82.5	17.5	262		0	28.1	0	43.1	0.00902		1.1	-2.7	-72.4	-9.61
GCIO	well-groundwater	314692	2271846	48	7.4	775	486		24.5	1.9	105.1	14	244		0	33.8	0	54.7	0.01391		1.2	1.2	-72.7	-9.43
GCSR2	well-groundwater			48.3	6.8	945	606		22	2.6	143.8	16.1	347		1.6	37.3	0	7.6	0.02746		1.3	-2.3	-72.4	-9.37
GACLaja	well-groundwater			60.4	6.9	940	470		87.3	7	149.7	28.4	308		0	210.6	0	53.9	0.00609		1.2	0.8	-70.7	-9.2
Los Azufres springs (Gonzalez Partida et al., 2005)
M-47	spring	325245	2189311	83	6.6	890	445		4.4	0.3	27.6	53.4	0.4			2.8		373			0.018		-10.3	-71.4
M-48	spring	325245	2189311	70	2.9	1335	667.5		18.6	2.2	26.8	29.6	0			4.2		732.8			0.037		-10.3	-71.4
M-38	spring	325245	2189311	91	2.2	7500	3750		8.2	0.3	27.3	34.8	0			19.6		1140.3			0.016		1.2	-27.9
M-27	spring	325245	2189311	78	2.31	3770	1885		53.33	49.29	23.22	16	0			3.22		1363			0.09		-0.6	-53.3
